# Supplementary material for: Investigating the day-to-day impact of hypoglycaemia in adults with type 1 or type 2 diabetes: design and validation protocol of the Hypo-METRICS application
Source: PubMed Central journal article supplement — BMJ Open. 2022 Feb 1;12(2):e051651. doi: 10.1136/bmjopen-2021-051651 (PMC8808414; doi:10.1136/bmjopen-2021-051651), 2022-02-01
Supplement: bmjopen-2021-051651supp001.pdf [file bmjopen-2021-051651supp001.pdf]

**Table S1 – validated questionnaires used for assessment of construct validity**

| Construct measured                | Validated questionnaires                                                                                  |
|-----------------------------------|-----------------------------------------------------------------------------------------------------------|
| Sleep quality / sleep disturbance | Patient-Reported Outcomes Measurement Information System (PROMIS) - Sleep Disturbance – Short Form 8b [2] |
| Depressive symptoms               | Patient Health Questionnaire – 9 (PHQ-9) [1]                                                              |
| Anxiety symptoms                  | General Anxiety Disorder-7 (GAD-7) [2]                                                                    |
| Vitality                          | Vitality subscale SF-36 [3]                                                                               |
| Cognitive functioning             | Perceived Deficit Questionnaire (PDQ-20) [4]                                                              |
| Fear of hypoglycaemia             | Hypoglycaemic Fear Survey II (HFS-II) [5]                                                                 |
| Diabetes Distress                 | Problem Areas In Diabetes (PAID-20) [6]                                                                   |
| Diabetes-specific Quality of life | Dawn Impact of Diabetes Profile (DIDP) [7]                                                                |
| Work and productivity             | Work Productivity and Activity Impairment Questionnaire: Specific Health Problem (WPAI:SHP) [8]           |

## References:

1. Kroenke, K., R.L. Spitzer, and J.B. Williams, *The PHQ-9: validity of a brief depression severity measure*. J Gen Intern Med, 2001. **16**(9): p. 606-13.
2. Spitzer, R.L., et al., *A brief measure for assessing generalized anxiety disorder: the GAD-7*. Arch Intern Med, 2006. **166**(10): p. 1092-7.
3. Ware, J.E., Jr. and C.D. Sherbourne, *The MOS 36-item short-form health survey (SF-36). I. Conceptual framework and item selection*. Med Care, 1992. **30**(6): p. 473-83.
4. Sullivan, M.J., et al., *Perceived cognitive deficits, emotional distress and disability following whiplash injury*. Pain Res Manag, 2002. **7**(3): p. 120-6.
5. Cox, D.J., et al., *Fear of hypoglycemia: quantification, validation, and utilization*. Diabetes Care, 1987. **10**(5): p. 617-21.
6. Polonsky, W.H., et al., *Assessment of diabetes-related distress*. Diabetes Care, 1995. **18**(6): p. 754-60.
7. Holmes-Truscott, E., et al., *Assessing the perceived impact of diabetes on quality of life: Psychometric validation of the DAWN2 Impact of Diabetes Profile in the second Diabetes MILES - Australia (MILES-2) survey*. Diabetes Res Clin Pract, 2019. **150**: p. 253-263.
8. Reilly, M.C., A.S. Zbrozek, and E.M. Dukes, *The validity and reproducibility of a work productivity and activity impairment instrument*. Pharmacoeconomics, 1993. **4**(5): p. 353-65.
